# Supplementary material
Source: HighWire-hosted journal article supplement (https://erj.ersjournals.com/content/55/5/1902420)
Supplement: inline-supplementary-material-1 [file inline-supplementary-material-1.pdf]

## ONLINE SUPPLEMENT

### **Australian Mepolizumab Registry additional methods and results for:**

### ***Mepolizumab effectiveness and identification of super-responders in severe asthma (Harvey et al.)***

#### **METHODS**

##### **Human Research Ethics Committee approval**

Ethical approval for the registry was received from the Hunter New England Human Research Ethics Committee (HREC) for centres in New South Wales, Queensland, Victoria and South Australia, and also from the Mater Health Services HREC, Tasmanian Health and Medical HREC and South Metropolitan Health Service HREC.

##### **Multivariate regression analysis**

Baseline predictors of ACQ-5 response were evaluated using multiple linear regression. Baseline variables considered for inclusion were patient age, sex, body mass index category ( $<30$  or  $\geq 30$  kg/m<sup>2</sup>), blood eosinophil count (during 12 months prior), smoking status (ex-/current-smoker or never-smoker), age of asthma onset and atopic status (atopic or non-atopic). Variables for the multivariate models were chosen if the p-value was  $<0.2$  in the linear model. Age, sex, body mass index category, blood eosinophil count and age of asthma onset were included in the multivariate model. Results were considered significant when  $p < 0.05$ .

##### **Sub-group analyses**

Clinical responses to mepolizumab treatment [change from baseline in Asthma Control Questionnaire (ACQ-5) score, Asthma Quality of Life Questionnaire – standardised (AQLQ(S)) score and lung function]

were assessed according to patient age of asthma onset (<40 or ≥40 years), atopic status and baseline blood eosinophil level (≤600 or >600 cells/μL).

## **RESULTS**

### **Respiratory medication use and exemptions**

All patients were using an inhaled corticosteroid (ICS) and long-acting beta agonist (LABA), with the exception of 2 patients who were exempted from LABA use due to toxicity/inability to tolerate [median (IQR) (ICS) dose of 2000 (1000,2000) Chlorofluorocarbon-beclomethasone dipropionate (CFC-BDP) equivalents (mcg/day)].

### **Supplementary table S1: Patient comorbidities at baseline**

| <b>Comorbidities</b>                            | <b>n = 299</b> |
|-------------------------------------------------|----------------|
| Allergic rhinitis                               | 187 (62.5%)    |
| Gastro-oesophageal Reflux Disease               | 155 (51.8%)    |
| Obstructive Sleep Apnoea                        | 61 (20.4%)     |
| Vocal Cord Dysfunction                          | 27 (9.0%)      |
| Chronic Obstructive Pulmonary Disease           | 51 (17.1%)     |
| Bronchiectasis                                  | 40 (13.4%)     |
| Nasal Polyps                                    | 103 (34.4%)    |
| Osteoporosis                                    | 60 (20.1%)     |
| Aspirin sensitivity                             | 36 (12.0%)     |
| Cardiovascular disease                          | 70 (23.4%)     |
| Anaphylaxis                                     | 39 (13.0%)     |
| Eczema                                          | 61 (20.4%)     |
| Dysfunctional Breathing                         | 2 (0.7%)       |
| Allergic Bronchopulmonary Aspergillosis         | 25 (8.4%)      |
| Psychiatric disorder (anxiety/depression/other) | 86 (28.8%)     |
| Obesity, n=297                                  | 136 (45.8%)    |
| Diabetes                                        | 38 (12.7%)     |
| Other endocrine disorders                       | 18 (6.0%)      |

Data presented as n(%).

**Supplementary table S2: Serious adverse events recorded during the 12-month follow-up period for patients who commenced mepolizumab.**

| <b>Serious adverse events</b>                                                                                                                                         | <b>n=309</b>       |
|-----------------------------------------------------------------------------------------------------------------------------------------------------------------------|--------------------|
| Total number of serious adverse events reported                                                                                                                       | 25 (n=18 patients) |
| Serious adverse event outcome: Fatal<br><i>Cause of death:</i><br>Acute myocardial infarction<br>Ischaemic heart disease                                              | 2/25<br><br>1<br>1 |
| Causality to mepolizumab<br><br>Suspected<br>Not suspected                                                                                                            | 0/25<br>25         |
| Action regarding mepolizumab treatment<br><br>None<br>Temporarily adjusted or interrupted<br>Permanently discontinued                                                 | 20/25<br>4<br>1    |
| Reason permanently discontinued:<br>Metastatic brain lesion                                                                                                           | 1                  |
| Reasons temporarily adjusted or interrupted:<br>Right main pulmonary artery embolus<br>Pneumonia<br>Right middle cerebral artery stroke<br>Symmetrical polyarthralgia | 1<br>1<br>1<br>1   |

Data are reported as n/N events

**Supplementary table S3: Baseline characteristics of patients by baseline peripheral blood eosinophil level, and changes from baseline to follow-up with mepolizumab treatment.**

|                                        |                     | <b>BASELINE BLOOD<br/>EOSINOPHILS ≤600/μL</b>                     | <b>BASELINE BLOOD<br/>EOSINOPHILS &gt;600/μL</b>                     | <b>p-value</b> |
|----------------------------------------|---------------------|-------------------------------------------------------------------|----------------------------------------------------------------------|----------------|
| <b>Baseline characteristic</b>         | n=309               | n=178                                                             | n=131                                                                |                |
| ACQ-5 score                            | 3.4 (3.0, 4.2)      | 3.4 (3.0, 4.2)                                                    | 3.6 (3.0, 4.2)                                                       | 0.57           |
| FEV <sub>1</sub> % predicted (pre-B2)  | 56.90 ± 17.78       | 56.52 ± 18.34                                                     | 57.45 ± 17.03                                                        | 0.70           |
| AQLQ(S) mean score                     | 3.78 ± 1.16         | 3.77 ± 1.18                                                       | 3.80 ± 1.12                                                          | 0.83           |
| Maintenance OCS use                    | 144 (47%)           | 82 (46%)                                                          | 62 (47%)                                                             | 0.83           |
| OCS total daily dose*                  | 10 (5.0,12.5)       | 10.00 (5.00, 12.50)                                               | 10.00 (5.00, 12.50)                                                  | 0.91           |
| <b><i>Difference from baseline</i></b> | <b>Total</b>        | <b>BASELINE BLOOD<br/>EOSINOPHILS ≤600/μL</b>                     | <b>BASELINE BLOOD<br/>EOSINOPHILS &gt;600/μL</b>                     | <b>p-value</b> |
| <b>3-months</b>                        | n=299               | n=170                                                             | n=129                                                                |                |
| ACQ-5 mean score                       | -1.78 ± 1.24        | -1.60 ± 1.17                                                      | -2.02 ± 1.30                                                         | <b>0.013</b>   |
| FEV <sub>1</sub> % predicted (pre-B2)  | 4.73 (-1.38, 11.63) | 3.66 (-2.46, 11.85)                                               | 6.14 (1.08, 11.63)                                                   | 0.19           |
| AQLQ(S) mean score                     | 1.18 ± 1.13         | 1.01 ± 1.08                                                       | 1.43 ± 1.17                                                          | <b>0.019</b>   |
| <b>6-months</b>                        | n=284               | n=158                                                             | n=126                                                                |                |
| ACQ-5 mean score                       | -2.01 ± 1.18        | -1.82 ± 1.06                                                      | -2.25 ± 1.27                                                         | <b>0.003</b>   |
| FEV <sub>1</sub> % predicted (pre-B2)  | 3.74 (-2.74, 12.03) | 2.71 (-3.14, 7.89)                                                | 5.97 (-0.31, 13.50)                                                  | 0.055          |
| AQLQ(S) mean score                     | 1.31 ± 1.25         | 1.12 ± 1.20                                                       | 1.56 ± 1.28                                                          | <b>0.026</b>   |
| <b>12-months</b>                       | n=225               | n=122                                                             | n=103                                                                |                |
| ACQ-5 mean score                       | -2.19 ± 1.20        | -2.03 ± 1.05                                                      | -2.36 ± 1.33                                                         | <b>0.047</b>   |
| FEV <sub>1</sub> % predicted (pre-B2)  | 5.50 (-1.11, 13.91) | 3.18 (-1.65, 8.84)                                                | 8.02 (-0.90, 16.32)                                                  | <b>0.032</b>   |
| AQLQ(S) mean score                     | 1.54 ± 1.25         | 1.49 ± 1.19                                                       | 1.60 ± 1.32                                                          | 0.64           |
| <b><i>Difference from baseline</i></b> | <b>Total</b>        | <b>NOT on maintenance<br/>OCS + BLOOD<br/>EOSINOPHILS ≤600/μL</b> | <b>NOT on maintenance<br/>OCS + BLOOD<br/>EOSINOPHILS &gt;600/μL</b> | <b>p-value</b> |
| <b>3-months</b>                        | N=158               | N=91                                                              | N=67                                                                 |                |
| ACQ-5 mean score                       | -1.92 ± 1.23        | -1.69 ± 1.19                                                      | -2.21 ± 1.24                                                         | <b>0.023</b>   |
| FEV <sub>1</sub> % predicted (pre-B2)  | 4.41 (-1.81, 10.51) | 2.17 (-2.41, 9.52)                                                | 6.48 (2.21, 11.63)                                                   | 0.078          |
| AQLQ(S) mean score                     | 1.23 ± 1.18         | 0.95 ± 1.07                                                       | 1.65 ± 1.24                                                          | <b>0.006</b>   |
| <b>6-months</b>                        | N=156               | N=88                                                              | N=68                                                                 |                |
| ACQ-5 mean score                       | -2.14 ± 1.13        | -2.01 ± 1.02                                                      | -2.32 ± 1.24                                                         | 0.10           |
| FEV <sub>1</sub> % predicted (pre-B2)  | 4.24 (-1.03, 11.66) | 3.05 (-1.29, 7.55)                                                | 5.97 (-0.78, 13.62)                                                  | 0.27           |
| AQLQ(S) mean score                     | 1.39 ± 1.27         | 1.25 ± 1.16                                                       | 1.56 ± 1.38                                                          | 0.26           |
| <b>12-months</b>                       | N=124               | N=70                                                              | N=54                                                                 |                |
| ACQ-5 mean score                       | -2.33 ± 1.13        | -2.30 ± 1.05                                                      | -2.37 ± 1.23                                                         | 0.75           |
| FEV <sub>1</sub> % predicted (pre-B2)  | 6.74 (-0.87, 13.87) | 3.55 (-0.87, 8.63)                                                | 9.87 (2.40, 15.79)                                                   | <b>0.043</b>   |
| AQLQ(S) mean score                     | 1.58 ± 1.28         | 1.64 ± 1.16                                                       | 1.50 ± 1.44                                                          | 0.66           |
| <b><i>Difference from baseline</i></b> | <b>Total</b>        | <b>ON maintenance OCS<br/>+ BLOOD EOSINOPHILS<br/>≤600/μL</b>     | <b>ON maintenance OCS +<br/>BLOOD EOSINOPHILS<br/>&gt;600/μL</b>     | <b>p-value</b> |
| <b>3-months</b>                        | N=141               | N=79                                                              | N=62                                                                 |                |
| ACQ-5 mean score                       | -1.63 ± 1.24        | -1.52 ± 1.16                                                      | -1.79 ± 1.35                                                         | 0.26           |
| FEV <sub>1</sub> % predicted (pre-B2)  | 4.78 (-1.38, 12.89) | 4.76 (-2.77, 13.72)                                               | 5.59 (-0.61, 11.83)                                                  | 0.94           |
| AQLQ(S) mean score                     | 1.13 ± 1.08         | 1.09 ± 1.10                                                       | 1.20 ± 1.06                                                          | 0.65           |

| <b>6-months</b>                       | <b>N=128</b>        | <b>N=70</b>         | <b>N=58</b>         |              |
|---------------------------------------|---------------------|---------------------|---------------------|--------------|
| ACQ-5 mean score                      | -1.86 ± 1.22        | -1.59 ± 1.09        | -2.17 ± 1.30        | <b>0.009</b> |
| FEV <sub>1</sub> % predicted (pre-B2) | 3.47 (-3.14, 12.62) | 1.79 (-4.25, 12.10) | 6.06 (1.07, 13.06)  | 0.11         |
| AQLQ(S) mean score                    | 1.22 ± 1.23         | 0.95 ± 1.24         | 1.56 ± 1.16         | <b>0.038</b> |
| <b>12-months</b>                      | <b>N=101</b>        | <b>N=52</b>         | <b>N=49</b>         |              |
| ACQ-5 mean score                      | -2.01 ± 1.26        | -1.66 ± 0.93        | -2.35 ± 1.45        | <b>0.007</b> |
| FEV <sub>1</sub> % predicted (pre-B2) | 3.95 (-1.65, 14.19) | 3.03 (-2.18, 11.35) | 6.56 (-0.93, 16.39) | 0.31         |
| AQLQ(S) mean score                    | 1.49 ± 1.21         | 1.27 ± 1.23         | 1.70 ± 1.18         | 0.20         |

Baseline data presented as mean±SD, Student's t test, median (IQR), Wilcoxon rank-sum test; n(%), Pearson's chi-squared or Fisher's exact test. Response data presented as mean±SD difference, Two-sample t test, median (IQR) difference, Wilcoxon rank-sum. ACQ: Asthma Control Questionnaire, AQLQ(S): Asthma Quality of Life Questionnaire (standardised), B2: bronchodilator, FEV<sub>1</sub>: forced expiratory volume in 1 second. OCS: Oral Corticosteroids. \*OCS total daily dose, prednisolone equivalents (mg/day).

**Supplementary table S4: Changes from baseline to follow-up with mepolizumab treatment, by sub-group (age of asthma onset, atopic status and baseline body mass index)**

| <i><b>Difference from baseline</b></i> | <b>Total</b>        | <b>AGE of ASTHMA ONSET &lt;40 YEARS</b> | <b>AGE of ASTHMA ONSET ≥40 YEARS</b> | <b>p-value</b> |
|----------------------------------------|---------------------|-----------------------------------------|--------------------------------------|----------------|
| <b>6-months</b>                        | n=252               | n=175                                   | n=77                                 |                |
| ACQ-5 mean score                       | -1.98 ± 1.16        | -1.95 ± 1.12                            | -2.07 ± 1.25                         | 0.44           |
| FEV <sub>1</sub> % predicted (pre-B2)  | 3.72 (-2.74, 12.16) | 4.59 (-2.40, 11.99)                     | 3.17 (-3.79, 16.42)                  | 0.95           |
| AQLQ(S) mean score                     | 1.31 ± 1.25         | 1.36 ± 1.20                             | 1.19 ± 1.38                          | 0.47           |
| <b>12-months</b>                       | n=196               | n=135                                   | n=61                                 |                |
| ACQ-5 mean score                       | -2.16 ± 1.18        | -2.13 ± 1.16                            | -2.22 ± 1.25                         | 0.65           |
| FEV <sub>1</sub> % predicted (pre-B2)  | 6.20 (-1.11, 13.91) | 4.08 (-1.04, 11.82)                     | 10.00 (-3.09, 15.79)                 | 0.29           |
| AQLQ(S) mean score                     | 1.54 ± 1.26         | 1.59 ± 1.33                             | 1.41 ± 1.09                          | 0.46           |
| <i><b>Difference from baseline</b></i> | <b>Total</b>        | <b>NON-ATOPIC</b>                       | <b>ATOPIC</b>                        | <b>p-value</b> |
| <b>6-months</b>                        | n=203               | n=58                                    | n=145                                |                |
| ACQ-5 mean score                       | -2.02 ± 1.19        | -2.00 ± 1.36                            | -2.03 ± 1.11                         | 0.88           |
| FEV <sub>1</sub> % predicted (pre-B2)  | 4.26 (-1.27, 11.66) | 5.29 (-0.77, 10.93)                     | 3.77 (-2.40, 11.99)                  | 0.55           |
| AQLQ(S) mean score                     | 1.42 ± 1.28         | 1.40 ± 1.30                             | 1.42 ± 1.28                          | 0.93           |
| <b>12-months</b>                       | n=163               | n=49                                    | n=114                                |                |
| ACQ-5 mean score                       | -2.17 ± 1.19        | -2.40 ± 1.26                            | -2.07 ± 1.14                         | 0.10           |
| FEV <sub>1</sub> % predicted (pre-B2)  | 6.59 (-1.04, 13.91) | 6.74 (-0.87, 18.05)                     | 5.12 (-1.99, 12.02)                  | 0.19           |
| AQLQ(S) mean score                     | 1.64 ± 1.27         | 1.82 ± 1.33                             | 1.55 ± 1.25                          | 0.32           |
| <i><b>Difference from baseline</b></i> | <b>Total</b>        | <b>BASELINE BMI &lt;35</b>              | <b>BASELINE BMI ≥35</b>              | <b>p-value</b> |
| <b>6-months</b>                        | n=274               | n=211                                   | n=63                                 |                |
| ACQ-5 mean score                       | -2.03 ± 1.18        | -2.11 ± 1.16                            | -1.74 ± 1.21                         | <b>0.039</b>   |
| FEV <sub>1</sub> % predicted (pre-B2)  | 3.72 (-2.74, 11.99) | 3.25 (-2.81, 11.99)                     | 4.15 (-1.24, 12.16)                  | 0.93           |
| AQLQ(S) mean score                     | 1.31 ± 1.25         | 1.40 ± 1.31                             | 1.05 ± 1.00                          | 0.13           |
| <b>12-months</b>                       | n=216               | n=168                                   | n=48                                 |                |
| ACQ-5 mean score                       | -2.21 ± 1.20        | -2.21 ± 1.17                            | -2.21 ± 1.32                         | 0.98           |
| FEV <sub>1</sub> % predicted (pre-B2)  | 5.83 (-1.11, 13.91) | 6.66 (-1.11, 15.79)                     | 3.42 (-1.08, 9.25)                   | 0.14           |
| AQLQ(S) mean score                     | 1.54 ± 1.25         | 1.62 ± 1.27                             | 1.27 ± 1.14                          | 0.19           |

Data presented as mean±SD difference, Two-sample t test, median (IQR) difference, Wilcoxon rank-sum, ACQ: Asthma Control Questionnaire, AQLQ(S): Asthma Quality of Life Questionnaire (standardised), BMI: Body mass index, FEV<sub>1</sub>: forced expiratory volume in 1 second. Atopy positive classified by positive skin prick test or Radioallergosorbent test/ImmunoCAP and/or previous omalizumab treatment.

**Supplementary table S5. Baseline characteristics of patients by age of asthma onset (<40 or ≥40 years)**

|                                        | Age of asthma onset<br>< 40 years (n=188) | Age of asthma onset<br>≥ 40 years (n=86) | p-value |
|----------------------------------------|-------------------------------------------|------------------------------------------|---------|
| Age                                    | 56.36 (45.59, 64.99) (n=188)              | 67.13 (60.96, 72.60) (n=85)              | <0.001  |
| Gender (% male)                        | 69 (36.7%)                                | 50 (58.1%)                               | <0.001  |
| Smoking:                               |                                           |                                          | 0.034   |
| Never                                  | 123 (65.8%)                               | 45 (52.9%)                               |         |
| Current                                | 0 (0.0%)                                  | 1 (1.2%)                                 |         |
| Ex                                     | 64 (34.2%)                                | 39 (45.9%)                               |         |
| Pack years (ex/current smokers)        | 12.25 (2.70, 20.00) (n=62)                | 25.00 (9.00, 39.75) (n=39)               | 0.002   |
| Body Mass Index kg/m <sup>2</sup>      | 29.53 (24.96, 34.89) (n=183)              | 29.98 (27.13, 34.37) (n=83)              | 0.64    |
| Atopy                                  | 103 (71.5%)                               | 36 (61.0%)                               | 0.21    |
| Asthma duration, years                 | 37.90 (24.32, 51.95) (n=188)              | 12.28 (4.92, 18.79) (n=85)               | <0.001  |
| ACQ-5 score                            | 3.40 (2.80, 4.20) (n=186)                 | 3.60 (3.00, 4.20) (n=86)                 | 0.28    |
| <b>Exacerbation history, past year</b> |                                           |                                          |         |
| Course of OCS required                 | 178 (94.7%)                               | 83 (96.5%)                               | 0.76    |
| Number of OCS courses                  | 4.00 (2.00, 6.00) (n=174)                 | 3.00 (2.00, 5.00) (n=83)                 | 0.028   |
| Number of hospital admissions          | 1.00 (1.00, 2.00) (n=48)                  | 1.00 (1.00, 2.00) (n=26)                 | 0.72    |
| <b>Pre-bronchodilator spirometry</b>   |                                           |                                          |         |
| FEV1 % predicted                       | 56.04 ± 17.60 (n=150)                     | 59.37 ± 17.78 (n=67)                     | 0.20    |
| FVC % predicted                        | 77.57 ± 16.19 (n=150)                     | 83.00 ± 15.83 (n=66)                     | 0.023   |
| FEV1/FVC                               | 0.57 ± 0.13 (n=150)                       | 0.56 ± 0.13 (n=66)                       | 0.43    |
| <b>Biomarkers</b>                      |                                           |                                          |         |
| Peripheral blood eosinophils, cells/μL | 600 (400, 840) (n=185)                    | 590 (380, 880) (n=85)                    | 0.95    |
| IgE, IU/mL                             | 140 (42, 527) (n=131)                     | 139 (70, 264) (n=56)                     | 0.63    |
| FeNO, ppb                              | 32 (18, 61) (n=99)                        | 37 (21, 60) (n=45)                       | 0.55    |
| <b>Asthma triggers</b>                 |                                           |                                          |         |
| Seasons                                | 147 (78.2%)                               | 50 (58.1%)                               | <0.001  |
| Exercise                               | 156 (83.0%)                               | 61 (70.9%)                               | 0.023   |
| URTI                                   | 160 (85.1%)                               | 68 (79.1%)                               | 0.21    |
| Reflux                                 | 50 (26.6%)                                | 20 (23.3%)                               | 0.56    |
| Pets                                   | 64 (34.0%)                                | 13 (15.1%)                               | 0.001   |
| Food                                   | 64 (34.0%)                                | 14 (16.3%)                               | 0.002   |
| Aspirin                                | 31 (16.5%)                                | 5 (5.8%)                                 | 0.015   |
| Other                                  | 76 (40.4%)                                | 24 (27.9%)                               | 0.046   |
| <b>Comorbidities</b>                   |                                           |                                          |         |
| Allergic rhinitis                      | 135 (71.8%)                               | 46 (54.1%)                               | 0.004   |
| GORD                                   | 105 (55.9%)                               | 40 (47.1%)                               | 0.18    |
| COPD                                   | 28 (14.9%)                                | 21 (24.7%)                               | 0.050   |
| Obstructive sleep apnoea               | 42 (22.3%)                                | 18 (21.2%)                               | 0.83    |
| Bronchiectasis                         | 28 (14.9%)                                | 9 (10.6%)                                | 0.45    |
| Nasal polyps                           | 69 (36.7%)                                | 30 (35.3%)                               | 0.82    |
| Eczema                                 | 51 (27.1%)                                | 7 (8.2%)                                 | <0.001  |
| Psychiatric disorder                   | 64 (34.0%)                                | 18 (21.2%)                               | 0.032   |
| Osteoporosis                           | 45 (23.9%)                                | 11 (12.9%)                               | 0.037   |
| Cardiovascular disease                 | 38 (20.2%)                                | 27 (31.8%)                               | 0.038   |
| Obesity                                | 88 (48.1%)                                | 41 (49.4%)                               | 0.84    |

*(supplementary table S5 continued from previous page)* Data presented as mean±SD, Student's t test, median (IQR), Wilcoxon rank-sum test; n(%), Pearson's chi-squared or Fisher's exact test. Bold-type represents significant difference (p<0.05). ACQ: Asthma Control Questionnaire, ATSI: Aboriginal or Torres Strait Islander, BMI: Body Mass Index, COPD: Chronic obstructive pulmonary disease, FEV<sub>1</sub>: forced expiratory volume, FVC: forced vital capacity, FeNO; fraction of exhaled nitric oxide, GORD: Gastro-oesophageal Reflux Disease, OCS: oral corticosteroids. Atopy positive classified by positive skin prick test or Radioallergosorbent test/ImmunoCAP and/or previous omalizumab treatment.



**Supplementary table S6: Characteristics of patients with non-atopic eosinophilic asthma and atopic eosinophilic asthma prior to commencement of mepolizumab**

|                                                         | <b>Non-atopic eosinophilic asthma (n=65)</b> | <b>Atopic eosinophilic asthma (n=156)</b> | <b>p-value</b>   |
|---------------------------------------------------------|----------------------------------------------|-------------------------------------------|------------------|
| Age                                                     | 59.95 (54.49, 69.20) (n=65)                  | 59.10 (46.92, 66.96) (n=156)              | 0.26             |
| Gender (% male)                                         | 23 (35.4%)                                   | 72 (46.2%)                                | 0.14             |
| Race:                                                   |                                              |                                           | 0.35             |
| White                                                   | 58 (93.6%)                                   | 125 (85.0%)                               |                  |
| Asian                                                   | 1 (1.6%)                                     | 11 (7.5%)                                 |                  |
| Pacific Islander                                        | 1 (1.6%)                                     | 3 (2.0%)                                  |                  |
| Other                                                   | 2 (3.2%)                                     | 8 (5.5%)                                  |                  |
| Smoking:                                                |                                              |                                           | 0.50             |
| Never                                                   | 36 (56.3%)                                   | 98 (63.6%)                                |                  |
| Current                                                 | 0 (0.0%)                                     | 1 (0.7%)                                  |                  |
| Ex                                                      | 28 (43.7%)                                   | 55 (35.7%)                                |                  |
| Pack years (ex/current smokers)                         | 20.00 (12.75, 30.00) (n=27)                  | 12.00 (4.00, 35.00) (n=55)                | 0.32             |
| Asthma duration, years                                  | 24.15 (11.55, 37.75) (n=64)                  | 29.50 (16.40, 48.20) (n=139)              | <b>0.042</b>     |
| <b>Exacerbation history, past year</b>                  |                                              |                                           |                  |
| Course of OCS for exacerbation                          | 63 (96.9%)                                   | 147 (94.2%)                               | 0.51             |
| Number of OCS courses                                   | 4.00 (3.00, 7.00) (n=62)                     | 3.00 (2.00, 6.00) (n=144)                 | 0.060            |
| Number of hospital admissions                           | 1.00 (1.00, 4.00) (n=16)                     | 1.00 (1.00, 3.00) (n=48)                  | 0.88             |
| <b>Pre-bronchodilator spirometry</b>                    |                                              |                                           |                  |
| FEV <sub>1</sub> % predicted                            | 58.27 ± 18.60 (n=52)                         | 55.57 ± 17.74 (n=125)                     | 0.36             |
| FVC % predicted                                         | 78.08 ± 16.18 (n=51)                         | 77.50 ± 17.11 (n=125)                     | 0.84             |
| FEV <sub>1</sub> /FVC                                   | 0.58 ± 0.14 (n=51)                           | 0.57 ± 0.13 (n=125)                       | 0.41             |
| <b>Asthma control</b>                                   |                                              |                                           |                  |
| ACQ-5 score                                             | 3.80 (3.00, 4.40) (n=65)                     | 3.40 (3.00, 4.20) (n=154)                 | 0.084            |
| <b>Biomarkers</b>                                       |                                              |                                           |                  |
| Peripheral Blood eosinophils, cells/ $\mu$ L            | 500 (400, 850) (n=64)                        | 545 (400, 800) (n=154)                    | 0.92             |
| IgE, IU/mL                                              | 77.5 (18.0, 158.0) (n=54)                    | 213.0 (76.0, 717.0) (n=113)               | <b>&lt;0.001</b> |
| FeNO, ppb                                               | 43.0 (21.0, 102.0) (n=31)                    | 29.5 (17.0, 59.7) (n=86)                  | 0.10             |
| <b>Comorbidities</b>                                    |                                              |                                           |                  |
| Gastro-oesophageal reflux disease                       | 41 (63.1%)                                   | 74 (48.4%)                                | 0.047            |
| Bronchiectasis                                          | 5 (7.7%)                                     | 26 (17.0%)                                | 0.090            |
| Nasal polyps                                            | 21 (32.3%)                                   | 49 (32.0%)                                | 0.97             |
| ABPA                                                    | 0 (0.0%)                                     | 22 (14.4%)                                | <b>&lt;0.001</b> |
| <b>Respiratory medication use</b>                       |                                              |                                           |                  |
| ICS total daily dose (CFC-BDP equivalent, mcg/day)      | 2000.0 (2000.0, 2500.0) (n=65)               | 2000.0 (1000.0, 2000.0) (n=155)           | 0.070            |
| Maintenance OCS use                                     | 30 (46.2%)                                   | 69 (44.2%)                                | 0.79             |
| OCS total daily dose, prednisone equivalents mg/per day | 7.25 (5.00, 10.00) (n=30)                    | 10.00 (5.00, 12.50) (n=69)                | 0.26             |
| Total number of respiratory medications                 | 4.0 (3.0, 5.0) (n=65)                        | 4.0 (3.0, 5.0) (n=156)                    | 0.88             |

|                              |            |             |              |
|------------------------------|------------|-------------|--------------|
| ICS single device            | 27 (41.5%) | 33 (21.2%)  | <b>0.002</b> |
| ICS/LABA combination device  | 59 (90.8%) | 145 (92.9%) | 0.58         |
| Theophylline                 | 8 (12.3%)  | 5 (3.2%)    | <b>0.009</b> |
| LAMA/LABA combination device | 8 (12.3%)  | 4 (2.6%)    | <b>0.007</b> |
| Antifungal                   | 0 (0.0%)   | 8 (5.1%)    | 0.11         |
| Macrolide                    | 2 (3.1%)   | 24 (15.4%)  | <b>0.010</b> |

(Supplementary table S6 continued from previous page) Data presented as mean±SD, Student's t test; median (IQR), Wilcoxon rank-sum test; n(%), Pearson's chi-squared or Fisher's exact test. Bold-type represents significant difference (p<0.05). ABPA: Allergic bronchopulmonary aspergillosis, ACQ: Asthma Control Questionnaire, CFC-BDP: Chlorofluorocarbon-beclomethasone dipropionate, BMI: Body Mass Index, FEV<sub>1</sub>: forced expiratory volume, FVC: forced vital capacity, FeNO; fraction of exhaled nitric oxide, ICS: Inhaled corticosteroids, LABA: Long-acting beta agonist, LAMA: Long-acting muscarinic antagonist, OCS: oral corticosteroids. Atopy positive classified by positive skin prick test or Radioallergosorbent test/ImmunoCAP and/or previous omalizumab treatment.

**Supplementary table S7: Baseline characteristics of patients identified as mepolizumab responders and treatment failures**

|                                                       | <b>Responders<br/>(n=260)</b> | <b>Treatment failures<br/>(n=42)</b> | <b>p-<br/>value</b> |
|-------------------------------------------------------|-------------------------------|--------------------------------------|---------------------|
| Age                                                   | 59.30 (50.29, 68.12)          | 62.98 (51.81, 69.56)                 | 0.36                |
| Gender (% male)                                       | 110 (42.3%)                   | 19 (45.2%)                           | 0.72                |
| Smoking:                                              |                               |                                      | 0.79                |
| Never                                                 | 159 (61.6%)                   | 23 (59.0%)                           |                     |
| Current                                               | 2 (0.8%)                      | 0 (0.0%)                             |                     |
| Ex                                                    | 97 (37.6%)                    | 16 (41.0%)                           |                     |
| Pack years (ex/current smokers)                       | 15.00 (4.00, 30.00)           | 20.00 (9.00, 25.00)                  | 0.95                |
| Body Mass Index kg/m <sup>2</sup>                     | 29.41 (25.22, 34.37)          | 29.52 (26.93, 35.85)                 | 0.80                |
| Atopy                                                 | 133 (71.1%)                   | 21 (67.7%)                           | 0.70                |
| Asthma duration, years                                | 30.10 (14.72, 46.56)          | 21.47 (10.19, 42.33)                 | 0.14                |
| <b>Exacerbation history, past year</b>                |                               |                                      |                     |
| Course of OCS for exacerbation                        | 247 (95.0%)                   | 41 (97.6%)                           | 0.70                |
| Number of OCS courses                                 | 3.00 (2.00, 6.00)             | 3.00 (2.00, 5.00)                    | 0.76                |
| Number of hospital admissions                         | 1.00 (1.00, 2.00)             | 1.00 (1.00, 5.00)                    | 0.33                |
| <b>Pre-bronchodilator spirometry</b>                  |                               |                                      |                     |
| FEV <sub>1</sub> % predicted                          | 56.75 ± 17.51                 | 56.06 ± 19.71                        | 0.83                |
| FVC % predicted                                       | 79.25 ± 16.41                 | 74.02 ± 18.85                        | 0.095               |
| FEV <sub>1</sub> /FVC                                 | 0.56 ± 0.13                   | 0.61 ± 0.15                          | 0.055               |
| <b>Asthma control</b>                                 |                               |                                      |                     |
| ACQ-5 score                                           | 3.40 (3.00, 4.20)             | 3.80 (3.00, 4.40)                    | 0.48                |
| <b>Biomarkers</b>                                     |                               |                                      |                     |
| Peripheral Blood eosinophils, cells/μL                | 600 (400, 870)                | 400 (300, 690)                       | <b>&lt;0.001</b>    |
| IgE, IU/mL                                            | 129.0 (46.0, 416.0)           | 204.5 (91.0, 791.5)                  | 0.11                |
| FeNO, ppb                                             | 35.0 (18.5, 60.0)             | 32.0 (20.2, 64.2)                    | 0.53                |
| <b>Comorbidities</b>                                  |                               |                                      |                     |
| Allergic rhinitis                                     | 160 (63.5%)                   | 22 (55.0%)                           | 0.30                |
| GORD                                                  | 129 (51.2%)                   | 22 (55.0%)                           | 0.65                |
| COPD                                                  | 42 (16.7%)                    | 8 (20.0%)                            | 0.60                |
| Obstructive sleep apnoea                              | 52 (20.6%)                    | 9 (22.5%)                            | 0.79                |
| Bronchiectasis                                        | 37 (14.7%)                    | 3 (7.5%)                             | 0.32                |
| Nasal polyps                                          | 93 (36.9%)                    | 8 (20.0%)                            | <b>0.037</b>        |
| Eczema                                                | 49 (19.4%)                    | 10 (25.0%)                           | 0.42                |
| Psychiatric disorder                                  | 73 (29.0%)                    | 11 (27.5%)                           | 0.85                |
| Osteoporosis                                          | 52 (20.6%)                    | 7 (17.5%)                            | 0.65                |
| Cardiovascular disease                                | 56 (22.2%)                    | 12 (30.0%)                           | 0.28                |
| Obesity                                               | 115 (45.8%)                   | 17 (43.6%)                           | 0.80                |
| <b>Respiratory medication use</b>                     |                               |                                      |                     |
| ICS total daily dose (CFC-BDP equivalent, mcg/day)    | 2000 (1000, 2000)             | 2000 (1000, 2000)                    | 0.70                |
| Maintenance OCS use                                   | 114 (43.8%)                   | 27 (64.3%)                           | <b>0.014</b>        |
| OCS total daily dose, prednisolone equivalents mg/day | 7.50 (5.00, 12.50)            | 10.00 (5.00, 15.00)                  | 0.24                |

Data presented as mean±SD, Student's t test; median (IQR), Wilcoxon rank-sum test; n(%), Pearson's chi-squared or Fisher's exact test. Bold-type represents significant difference (p<0.05). PBS responders were

patients with a successful first continuation of PBS-subsidised mepolizumab treatment (ACQ-5 score reduction of at least 0.5 from baseline or at least 25% reduction in oral corticosteroid dose without deterioration of ACQ-5) at 6-months post-commencement. Treatment failures were patients who did not have a successful first continuation of PBS-subsidised mepolizumab treatment. ACQ: Asthma Control Questionnaire, CFC-BDP: Chlorofluorocarbon-beclomethasone dipropionate, FEV<sub>1</sub>: forced expiratory volume, FVC: forced vital capacity, FeNO; fraction of exhaled nitric oxide, ICS: Inhaled corticosteroids, PBS: Australian Government's Pharmaceutical Benefit Scheme. Atopy positive classified by positive skin prick test or Radioallergosorbent test/ImmunoCAP and/or previous omalizumab treatment.

**Supplementary table S8: Clinical response in super-responders [responders with top 25% of ACQ-5 change and patients who achieved well-controlled asthma symptoms (ACQ <1.0)]**

|                                                    | 6-month assessment |                                                        |                                         |                                                    |                               |
|----------------------------------------------------|--------------------|--------------------------------------------------------|-----------------------------------------|----------------------------------------------------|-------------------------------|
|                                                    | All PBS responders | Super-responders: Top 25% of ΔACQ5 from baseline group | Bottom 25% of ΔACQ5 from baseline group | Super-responders: Well controlled ACQ-5 <1.0 group | Uncontrolled ACQ-5 >1.5 group |
| <b>SYMPTOMS</b>                                    | n=252              | n=61                                                   | n=70                                    | n=79                                               | n=111                         |
| ΔACQ-5 improvement Median (IQR)                    | -2.0 (-1.4 , -3.0) | -3.4 (-3.2, -4.0)                                      | -1.0 (-0.6, -1.2)                       | -3.0 (-2.4 , -3.6)                                 | -1.4 (-1.0, -2.0)             |
| ΔACQ-5 improvement Mean ± SD                       | -2.15 ± 1.08       | -3.6 ± 0.64                                            | -0.93 ± 0.36                            | -3.05 ± 1.00                                       | -1.53 ± 0.74                  |
| <b>EXACERBATIONS</b>                               | n=260              | n=61                                                   | n=70                                    | n=79                                               | n=111                         |
| Patients free of exacerbations requiring OCS, n(%) | 141 (54.2%)        | 43 (70.5%)                                             | 30 (42.9%)                              | 53 (67.1%)                                         | 46 (41.4%)                    |
| <b>OCS USE</b>                                     | n=260              | n=61                                                   | n=70                                    | n=79                                               | n=111                         |
| Patients free of maintenance OCS use, n(%)         | 182 (70.0%)        | 47 (77.0%)                                             | 43 (61.4%)                              | 62 (78.5%)                                         | 69 (62.2%)                    |

PBS responders were patients with a successful first continuation of PBS-subsidised mepolizumab treatment (ACQ-5 score reduction of at least 0.5 from baseline or at least 25% reduction in oral corticosteroid dose without deterioration of ACQ-5) at 6-months post-commencement. ACQ: Asthma Control Questionnaire, OCS: Oral corticosteroids, PBS: Australian Government's Pharmaceutical Benefit Scheme.

**Supplementary table S9: Comparison of baseline characteristics and response to mepolizumab in AMR patients and regulatory trial participants.**

| <b>Baseline demographic and clinical characteristics</b> | <b>AMR</b>                                   | <b>MENSA active arm only (ref 9)</b>  | <b>MUSCA active arm only (ref 11)</b> | <b>p-value AMR vs MENSA</b> | <b>p-value AMR vs MUSCA</b> |
|----------------------------------------------------------|----------------------------------------------|---------------------------------------|---------------------------------------|-----------------------------|-----------------------------|
|                                                          | n = 309                                      | n = 194                               | n = 274                               |                             |                             |
| Age, years                                               | 58.0 ± 14.2<br>59.55 (49.99,68.28)           | 51                                    | 49.8 ± 14.0                           | <i>not able to compare</i>  | <b>p&lt;0.001</b>           |
| Female sex (%)                                           | 57.6                                         | 60                                    | 54                                    |                             |                             |
| Body mass index                                          | 30.7 ± 7.3<br>29.45 (25.30,34.46)            | 27.6 ± 6.2                            | 28.5 ± 6.6                            | <b>p&lt;0.001</b>           | <b>p&lt;0.001</b>           |
| Ex-smokers (%)*                                          | 38                                           | 26 (ex>10 pack years)                 | 26 (ex>10 pack years)                 | <i>not able to compare</i>  | <i>not able to compare</i>  |
| Asthma duration, years                                   | 30.7 ± 19.6<br>27.52 (13.30,46.08)<br>n =273 | 20.5 ± 12.9                           | 19.5 ± 14.7                           | <b>p&lt;0.001</b>           | <b>p&lt;0.001</b>           |
| Maintenance OCS use (%)                                  | 47                                           | 27                                    | 23                                    | <b>p&lt;0.001</b>           | <b>p&lt;0.001</b>           |
| FEV <sub>1</sub> % of predicted, pre-bronchodilator      | 56.9 ±17.8, n=233                            | 59.3 ± 17.5                           | 55.5 ± 14.4                           | p=0.14                      | p=0.3                       |
| FEV <sub>1</sub> % of BDR                                | 11.77 ± 15.45,<br>n=204                      | 27.9 ± 24.0                           | 22.0 ± 23.2                           | <b>p&lt;0.001</b>           | <b>p&lt;0.001</b>           |
| ACQ-5                                                    | 3.58 ± 0.91<br>3.4 (3.0,4.2), n =306         | 2.26 ± 1.27                           | 2.2 ± 1.1                             | <b>p&lt;0.001</b>           | <b>p&lt;0.001</b>           |
| Peripheral blood eosinophils, cells/μL                   | 693 ± 469<br>590 (400, 830)                  | 290 ± 1050                            | 300                                   | <b>p&lt;0.001</b>           | <i>not able to compare</i>  |
| Severe exacerbations requiring OCS, 12 months prior      | 4.5 ± 4.1<br>3.0 (2.0,6.0)                   | 3.8 ± 2.7                             | 2.9 ± 1.9                             | <b>p=0.021</b>              | <b>p&lt;0.001</b>           |
|                                                          |                                              |                                       |                                       |                             |                             |
| <b>Response to mepolizumab (change from baseline)</b>    | <b>AMR 100mg SC all patients</b>             | <b>MENSA 100mg SC active arm only</b> | <b>MUSCA 100mg SC active only</b>     | <b>p-value AMR vs MENSA</b> | <b>p-value AMR vs MUSCA</b> |
|                                                          | <b>6-8 months</b>                            | <b>32 weeks</b>                       | <b>24 weeks</b>                       |                             |                             |
| ACQ-5 score                                              | -2.01 ± 1.18<br>n =268                       | -0.94 ± 0.98<br>n =194                | -0.8 ± 0.16<br>n =266                 | <b>p&lt;0.001</b>           | <b>p&lt;0.001</b>           |

AMR data presented as median (IQR) and mean±SD or %/n. MENSA and MUSCA data are presented as mean±SD or %/n. Mean±SD compared by independent samples t-test and categorical data compared using Pearson's chi-squared test. \*Unable to compare smoking status due to definitional differences between AMR and MENSA/MUSCA. Bold-type represents significant difference (p<0.05). ACQ: Asthma Control Questionnaire, BDR: bronchodilator reversibility, FEV<sub>1</sub>: forced expiratory volume, FeNO; fraction of exhaled nitric oxide, OCS: oral corticosteroids.
