# Supplementary material
Source: HighWire-hosted journal article supplement (https://erj.ersjournals.com/content/55/5/1902420)
Supplement: inline-supplementary-material-2 [file inline-supplementary-material-2.pdf]

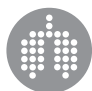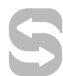

SHAREABLE PDF

# Mepolizumab effectiveness and identification of super-responders in severe asthma

Erin S. Harvey<sup>1,2</sup>, David Langton<sup>3,4</sup>, Constance Katelaris<sup>5,6</sup>, Sean Stevens<sup>1</sup>, Claude S. Farah<sup>7</sup>, Andrew Gillman<sup>8</sup>, John Harrington<sup>2</sup>, Mark Hew<sup>8</sup>, Vicky Kritikos<sup>9</sup>, Naghmeh Radhakrishna<sup>10</sup>, Philip Bardin<sup>11</sup>, Matthew Peters<sup>7</sup>, Paul N. Reynolds<sup>12</sup>, John W. Upham<sup>13,14</sup>, Melissa Baraket<sup>15,16</sup>, Simon Bowler<sup>17</sup>, Jeffrey Bowden<sup>18</sup>, Jimmy Chien<sup>19,20</sup>, Li Ping Chung<sup>21</sup>, Christopher Grainge<sup>2</sup>, Christine Jenkins<sup>7,22</sup>, Gregory P. Katsoulotos<sup>23,24,25</sup>, Joy Lee<sup>26</sup>, Vanessa M. McDonald<sup>1,2</sup>, Helen K. Reddel<sup>9</sup>, Janet Rimmer<sup>25,27</sup>, Peter A.B. Wark<sup>1,2</sup> and Peter G. Gibson<sup>1,2</sup>

**Affiliations:** <sup>1</sup>Centre of Excellence in Severe Asthma and Priority Research Centre for Healthy Lungs, Faculty of Health, University of Newcastle, Newcastle, Australia. <sup>2</sup>Dept of Respiratory and Sleep Medicine, John Hunter Hospital, Newcastle, Australia. <sup>3</sup>Faculty of Medicine, Nursing and Health Sciences, Monash University, Clayton, Australia. <sup>4</sup>Dept of Thoracic Medicine, Frankston Hospital, Frankston, Australia. <sup>5</sup>School of Medicine, Western Sydney University, Campbelltown, Australia. <sup>6</sup>Immunology and Allergy Unit, Campbelltown Hospital, Campbelltown, Australia. <sup>7</sup>Dept of Thoracic Medicine, Concord Hospital, Concord, Australia. <sup>8</sup>Allergy, Asthma and Clinical Immunology, Alfred Health, Melbourne, Australia. <sup>9</sup>Dept of Respiratory and Sleep Medicine, Royal Prince Alfred Hospital, Camperdown, Australia. <sup>10</sup>Respiratory Dept, St Vincent's Hospital, Melbourne, Australia. <sup>11</sup>Lung and Sleep Medicine, Monash University and Medical Centre, Clayton, Australia. <sup>12</sup>Lung Research, Hanson Institute and Dept of Thoracic Medicine, Royal Adelaide Hospital, Adelaide, Australia. <sup>13</sup>Dept of Respiratory Medicine, Princess Alexandra Hospital, Woolloongabba, Australia. <sup>14</sup>The University of Queensland Diamantina Institute, Woolloongabba, Australia. <sup>15</sup>South Western Sydney Clinical School, University of New South Wales, Sydney, Australia. <sup>16</sup>Ingham Institute for Applied Medical Research, Sydney, Australia. <sup>17</sup>Dept of Respiratory Medicine, Mater Hospital Brisbane, South Brisbane, Australia. <sup>18</sup>Respiratory and Sleep Services, Flinders Medical Centre and Flinders University, Bedford Park, Australia. <sup>19</sup>Dept of Sleep and Respiratory Medicine, Westmead Hospital, Westmead, Australia. <sup>20</sup>School of Medicine, The University of Sydney, Sydney, Australia. <sup>21</sup>Dept of Respiratory Medicine, Fiona Stanley Hospital, Murdoch, Australia. <sup>22</sup>Concord Clinical School University of Sydney, Concord, Australia. <sup>23</sup>St George Specialist Centre, Kogarah, Australia. <sup>24</sup>St George and Sutherland Clinical School, University of New South Wales, Sydney, Australia. <sup>25</sup>Woolcock Institute of Medical Research, Glebe, Australia. <sup>26</sup>Austin Health and Monash University, Melbourne, Australia. <sup>27</sup>St Vincent's Clinic, Darlinghurst, Australia.

**Correspondence:** Peter G. Gibson, Hunter Medical Research Institute, Lot 1 Kookaburra Circuit, New Lambton Heights NSW 2305, Australia. E-mail: peter.gibson@health.nsw.gov.au

@ERSpublications

**In clinical practice, mepolizumab reduces the burden of severe eosinophilic asthma by reducing severe exacerbations and improving asthma control, quality of life and lung function. Super-responders have a T2 phenotype and few comorbidities.** <http://bit.ly/2UIio4x>

**Cite this article as:** Harvey ES, Langton D, Katelaris C, *et al.* Mepolizumab effectiveness and identification of super-responders in severe asthma. *Eur Respir J* 2020; 55: 1902420 [https://doi.org/10.1183/13993003.02420-2019].

This single-page version can be shared freely online.

**ABSTRACT** Severe asthma is a high-burden disease. Real-world data on mepolizumab in patients with severe eosinophilic asthma is needed to assess whether the data from randomised controlled trials are applicable in a broader population.

The Australian Mepolizumab Registry (AMR) was established with an aim to assess the use, effectiveness and safety of mepolizumab for severe eosinophilic asthma in Australia.

Patients (n=309) with severe eosinophilic asthma (median age 60 years, 58% female) commenced mepolizumab. They had poor symptom control (median Asthma Control Questionnaire (ACQ)-5 score of 3.4), frequent exacerbations (median three courses of oral corticosteroids (OCS) in the previous 12 months), and 47% required daily OCS. Median baseline peripheral blood eosinophil level was  $590 \text{ cells-}\mu\text{L}^{-1}$ . Comorbidities were common: allergic rhinitis 63%, gastro-oesophageal reflux disease 52%, obesity 46%, nasal polyps 34%.

Mepolizumab treatment reduced exacerbations requiring OCS compared with the previous year (annualised rate ratio 0.34 (95% CI 0.29–0.41);  $p<0.001$ ) and hospitalisations (rate ratio 0.46 (95% CI 0.33–0.63);  $p<0.001$ ). Treatment improved symptom control (median ACQ-5 reduced by 2.0 at 6 months), quality of life and lung function. Higher blood eosinophil levels ( $p=0.003$ ) and later age of asthma onset ( $p=0.028$ ) predicted a better ACQ-5 response to mepolizumab, whilst being male ( $p=0.031$ ) or having body mass index  $\geq 30$  ( $p=0.043$ ) predicted a lesser response. Super-responders (upper 25% of ACQ-5 responders, n=61, 24%) had a higher T2 disease burden and fewer comorbidities at baseline.

Mepolizumab therapy effectively reduces the significant and long-standing disease burden faced by patients with severe eosinophilic asthma in a real-world setting.
